# Supplementary material
Source: PubMed Central journal article supplement (PMC3663553)

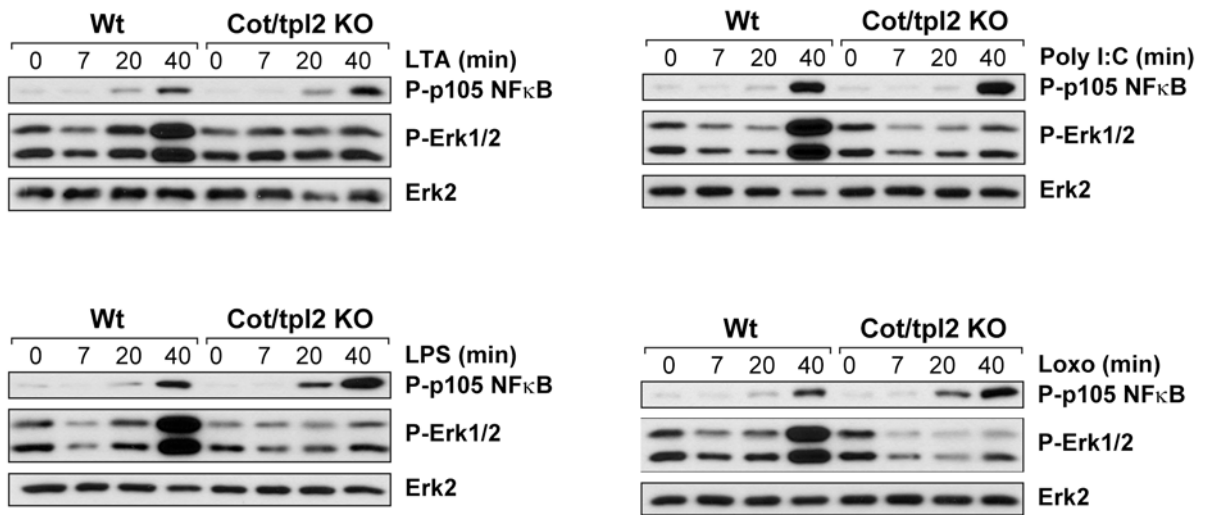

Figure S4

Supplement: supp_M112.439547_jbc.M112.439547-1.pdf [file supp_M112.439547_jbc.M112.439547-1.pdf]
